# Supplementary material
Source: publisher figshare collection journal article supplement (https://acs.figshare.com/ndownloader/files/17288405)
Supplement: Supplementary file 1 [file 17288405]

## SUPPLEMENTARY INFORMATION

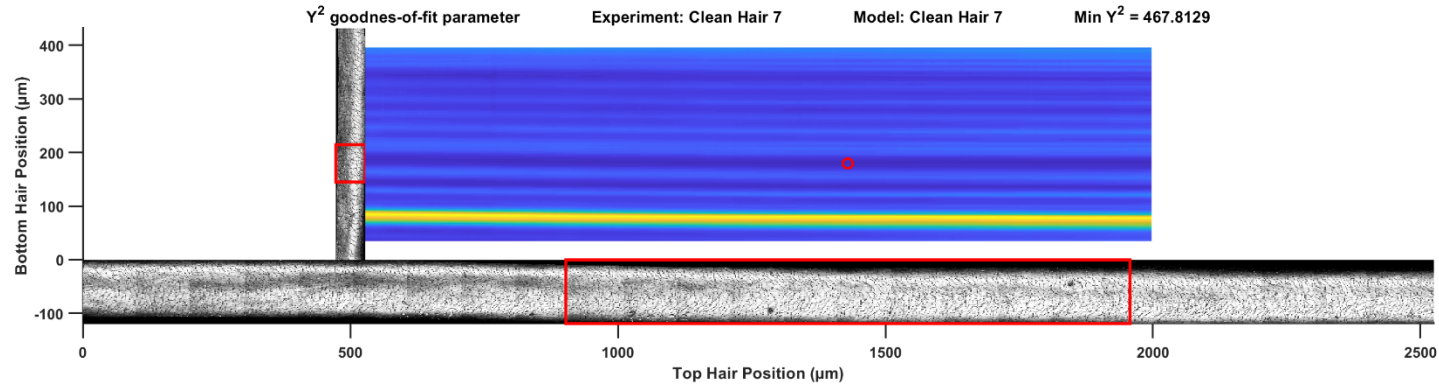

**Figure S1.** Goodness of fit map between measured adhesion forces from Clean Hair 7 and surface profilometry model from Clean Hair 7. Corresponds to the histograms in Main Text Figure 12A.  $Y^2$  increases from blue to yellow. Approximately 400  $\mu\text{m}$  of the probe hair (bottom hair) and approximate 2.5 mm of the fixed hair (top hair) are shown and are aligned to scale with the vertical and horizontal axes, respectively. The  $Y^2$  goodness-of-fit parameter is calculated for the overall adhesion force distribution modeled using an overall translation of 1 mm of the top hair and 15  $\mu\text{m}$  of the bottom hair centered at each point in the goodness-of-fit map. The open red circle on the goodness-of-fit map indicates the minimum  $Y^2$  parameter which was calculated from the segments of hair within the red boxes.

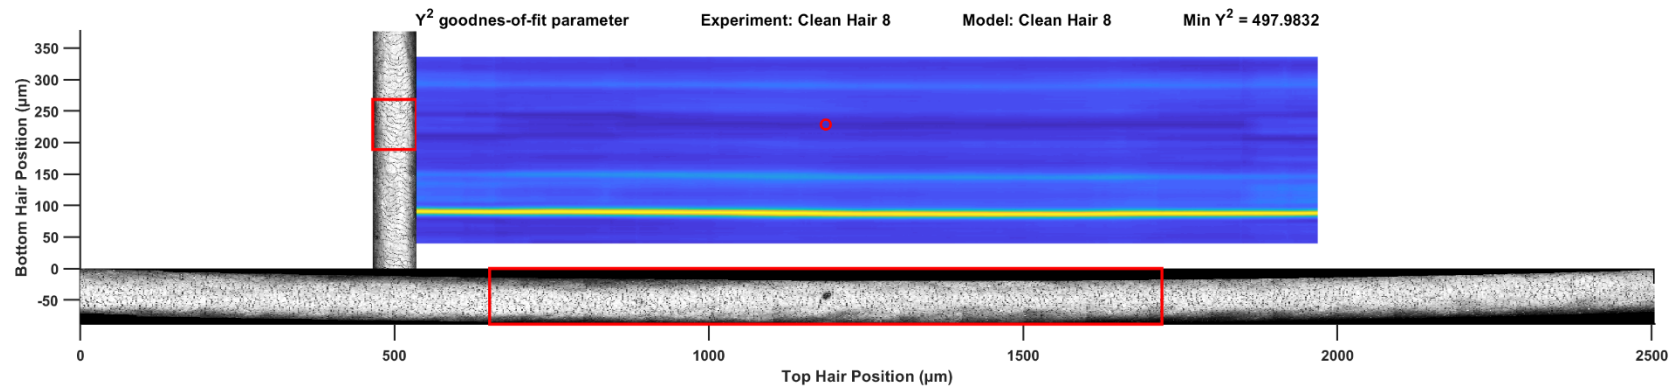

**Figure S2.** Goodness of fit map as in Figure S1 but for measured adhesion forces from Clean Hair 8 and surface profilometry model from Clean Hair 8. Corresponds to the histograms in Main Text Figure 12B. Translation distance used for the top hair segment in the model was 10  $\mu\text{m}$ .

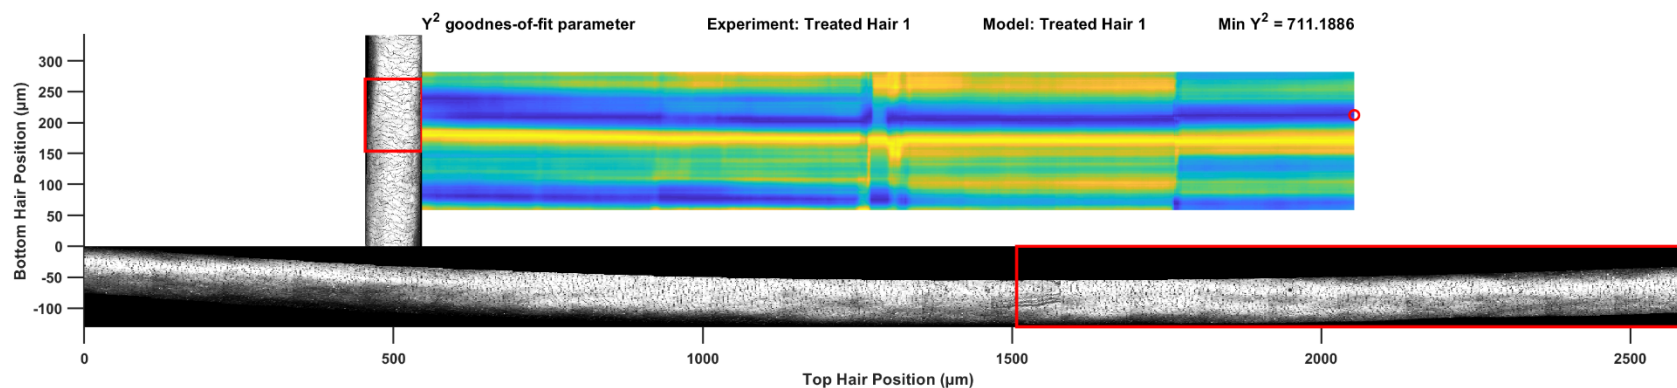

**Figure S3.** Goodness of fit map as in SI Figure S1 but for measured adhesion forces from Treated Hair 1 and surface profilometry model from Treated Hair 1. Corresponds to the histograms in Main Text Figure 12C. Translation distance used for the top hair segment in the model was 25  $\mu\text{m}$ .

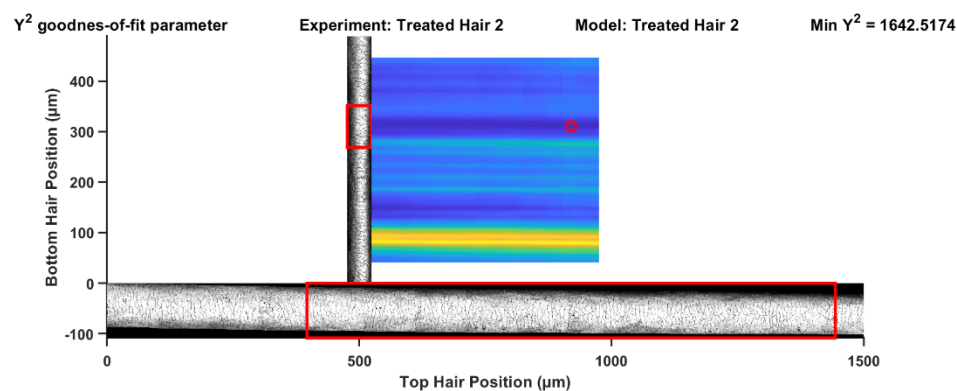

**Figure S4.** Goodness of fit map as in Figure S1 but for measured adhesion forces from Treated Hair 2 and surface profilometry model from Treated Hair 2. Corresponds to the histograms in Main Text Figure 12D. Translation distance used for the top hair segment in the model was 35  $\mu\text{m}$ .

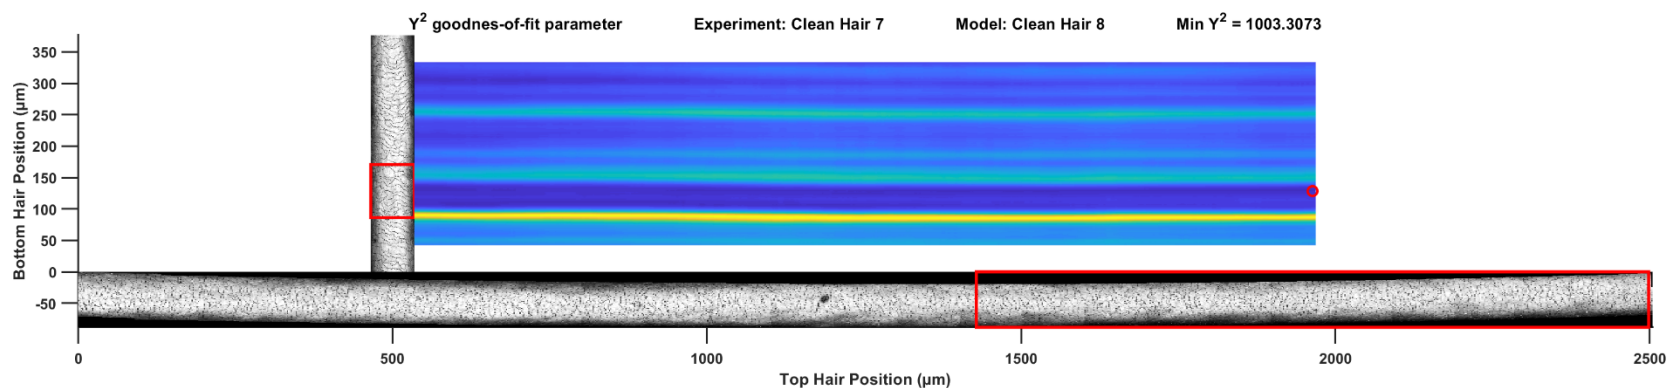

**Figure S5.** Goodness of fit map as in Figure S1 but for measured adhesion forces from Clean Hair 7 and surface profilometry model from Clean Hair 8. Corresponds to the histograms in Main Text Figure 12E. Translation distance used for the top hair segment in the model was 10  $\mu\text{m}$ .

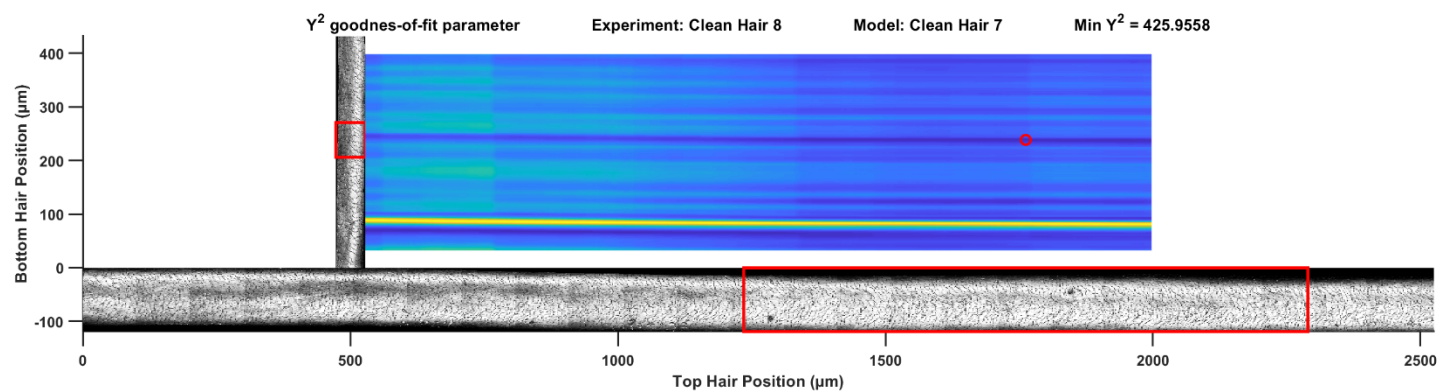

**Figure S6.** Goodness of fit map as in Figure S1 but for measured adhesion forces from Clean Hair 8 and surface profilometry model from Clean Hair 7. Corresponds to the histograms in Main Text Figure 12F. Translation distance used for the top hair segment in the model was 15  $\mu\text{m}$ .

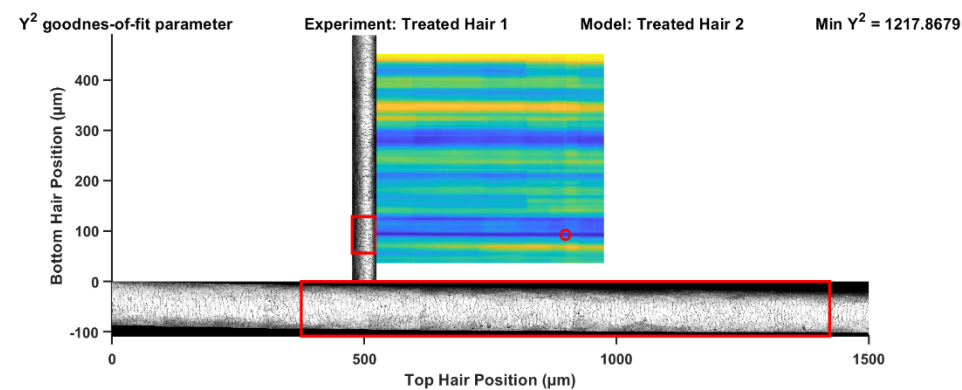

**Figure S7.** Goodness of fit map as in Figure S1 but for measured adhesion forces from Treated Hair 1 and surface profilometry model from Treated Hair 2. Corresponds to the histograms in Main Text Figure 12G. Translation distance used for the top hair segment in the model was 35  $\mu\text{m}$ .

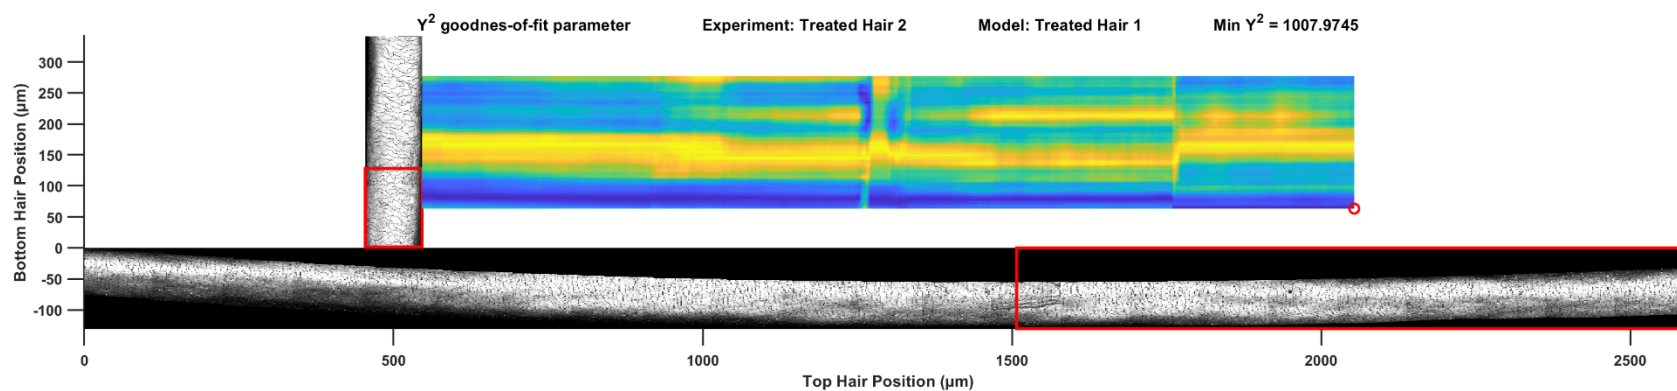

**Figure S8.** Goodness of fit map as in Figure S1 but for measured adhesion forces from Treated Hair 2 and surface profilometry model from Treated Hair 1. Corresponds to the histograms in Main Text Figure 12H. Translation distance used for the top hair segment in the model was 25  $\mu\text{m}$ .

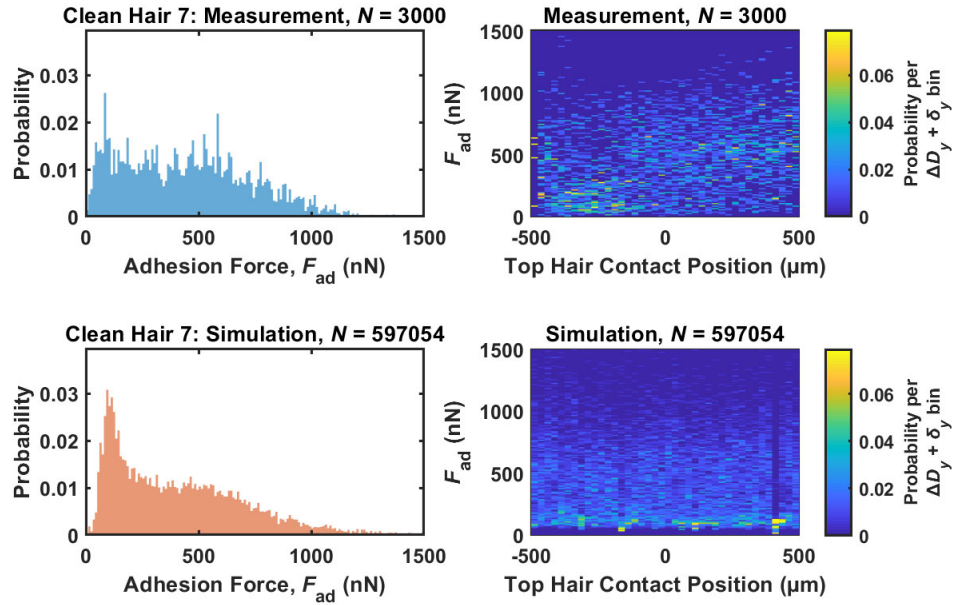

**Figure S9.** Overall (left) and spatially resolved (right) adhesion force distributions corresponding to the measured adhesion force from Clean Hair 7 (top) and the modeled forces for Clean Hair 7 from its surface topography (bottom). The modeled forces use the sections of the top and bottom hair segments boxed in red in **Figure S1** corresponding to the minimum  $Y^2$  parameter. Top hair contact locations for both measured and modeled data are relative to the center of the total interval.

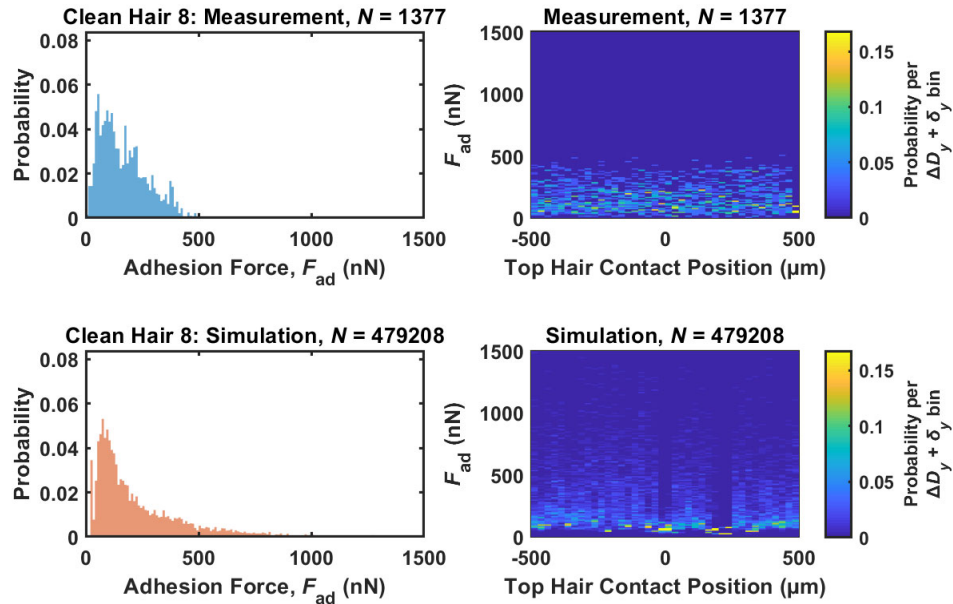

**Figure S10.** Adhesion distributions as in **Figure S9** but for measurements from Clean Hair 8 and modeled forces from Clean Hair 8. Modeled distributions correspond to the red boxed regions in **Figure S2**.

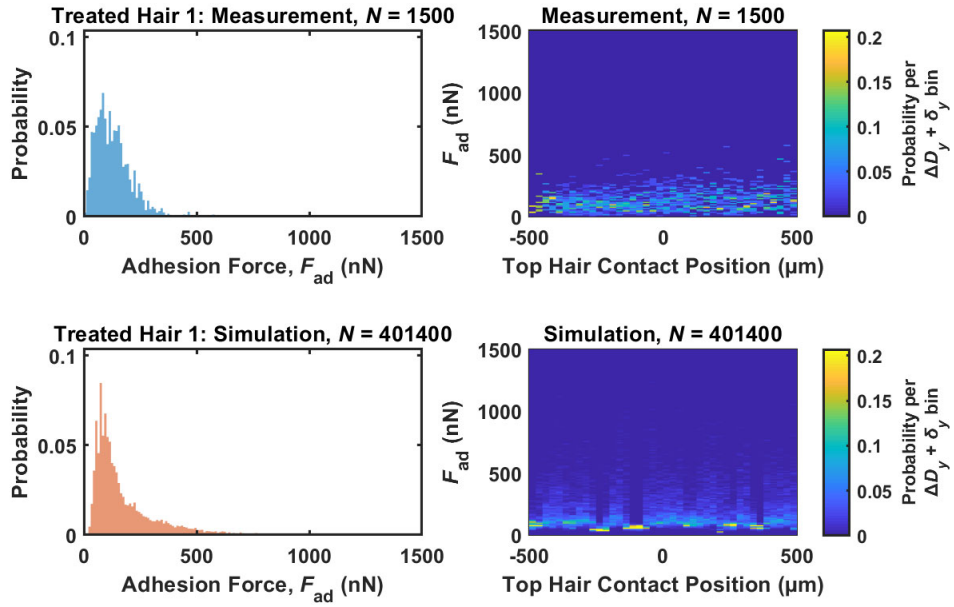

**Figure S11.** Adhesion distributions as in **Figure S9** but for measurements from Treated Hair 1 and modeled forces from Treated Hair 1. Modeled distributions correspond to the red boxed regions in **Figure S3**.

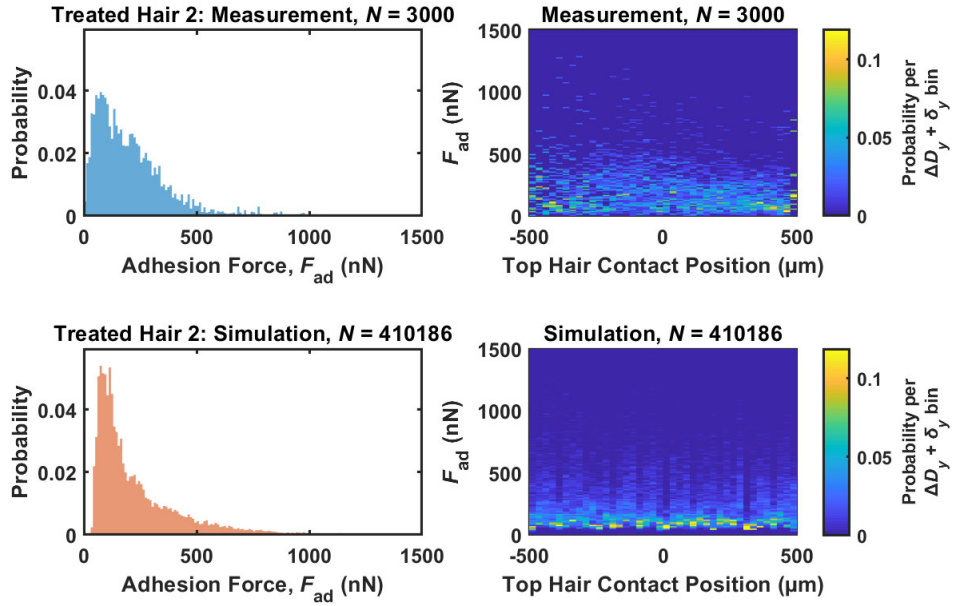

**Figure S12.** Adhesion distributions as in **Figure S9** but for measurements from Treated Hair 2 and modeled forces from Treated Hair 2. Modeled distributions correspond to the red boxed regions in **Figure S4**.



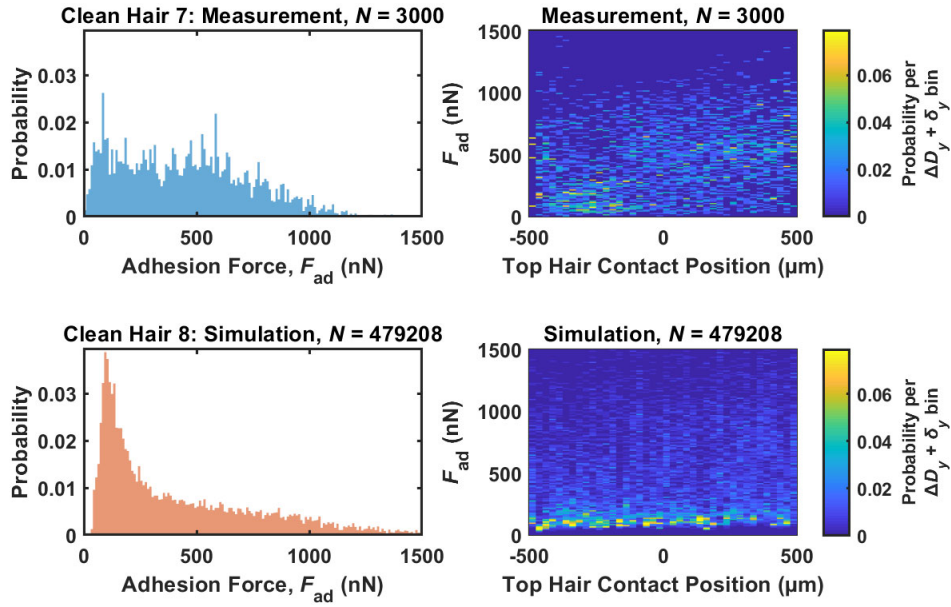

**Figure S13.** Adhesion distributions as in **Figure S9** but for measurements from Clean Hair 7 and modeled forces from Clean Hair 8. Modeled distributions correspond to the red boxed regions in **Figure S5**.

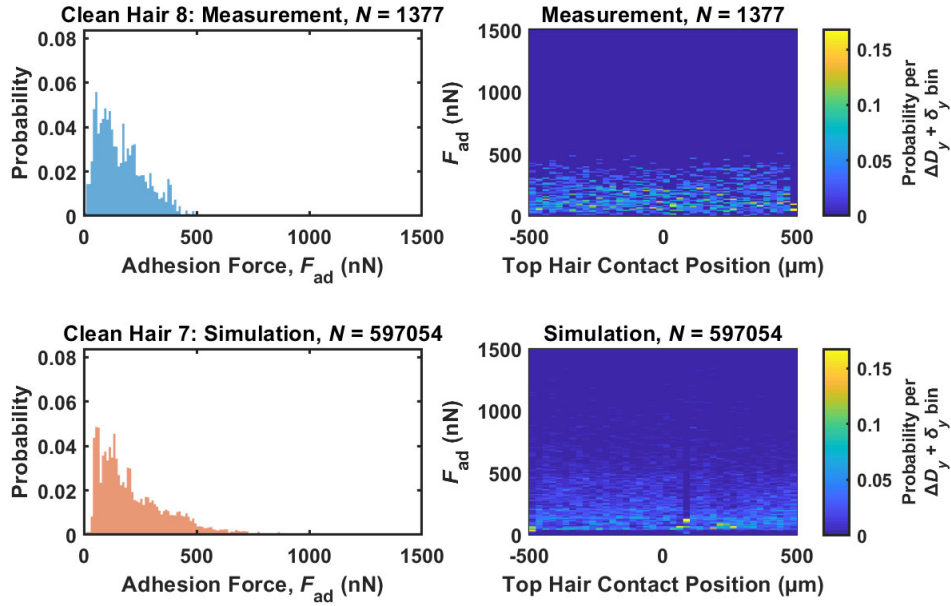

**Figure S14.** Adhesion distributions as in **Figure S9** but for measurements from Clean Hair 8 and modeled forces from Clean Hair 7. Modeled distributions correspond to the red boxed regions in **Figure S6**.

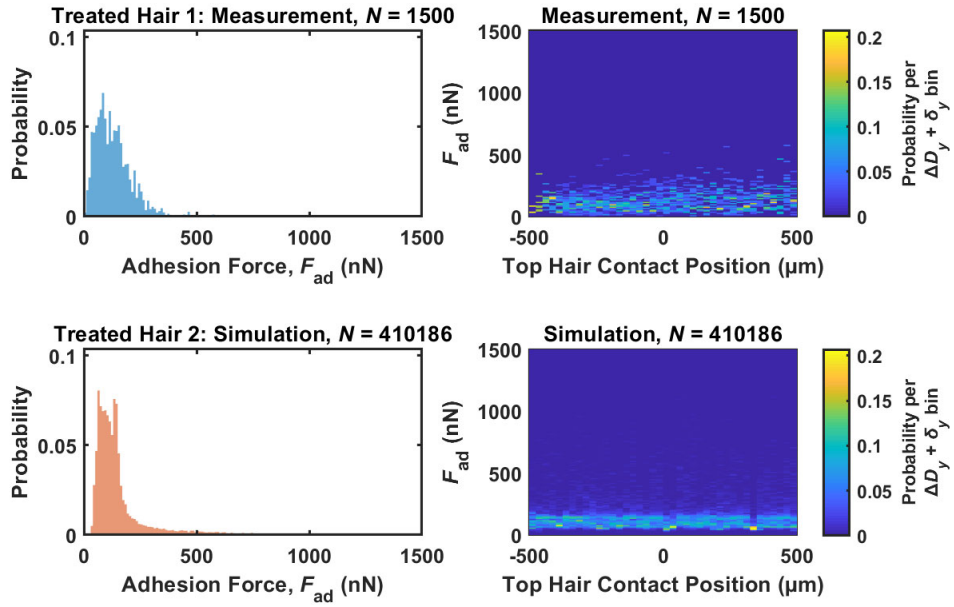

**Figure S15.** Adhesion distributions as in **Figure S9** but for measurements from Treated Hair 1 and modeled forces from Treated Hair 2. Modeled distributions correspond to the red boxed regions in **Figure S7**.

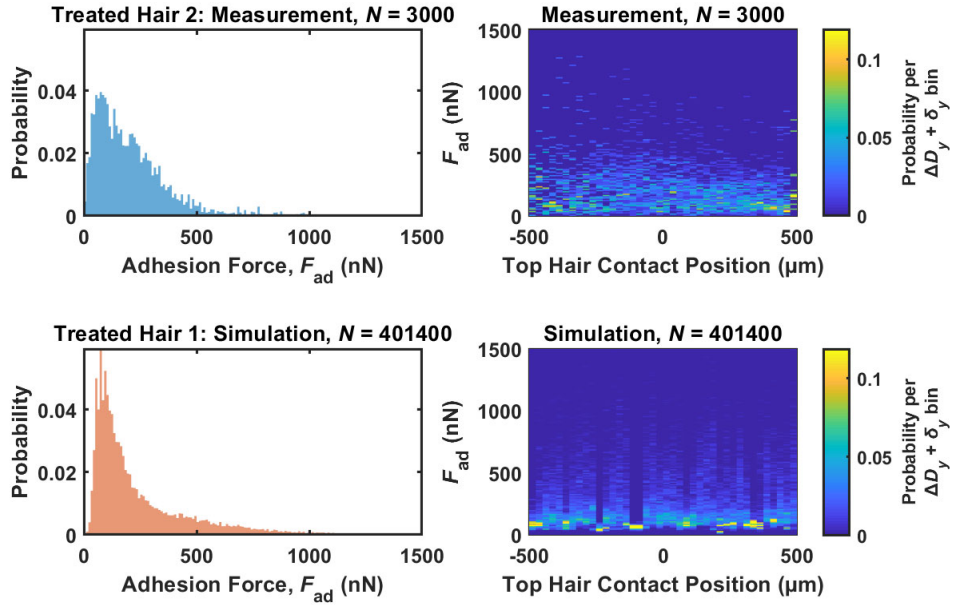

**Figure S16.** Adhesion distributions as in **Figure S9** but for measurements from Treated Hair 2 and modeled forces from Treated Hair 1. Modeled distributions correspond to the red boxed regions in **Figure S8**.
